# Supplementary material for: Interface engineering of calligraphic ink mediated conformal polymer fibers for advanced flexible supercapacitors
Source: Royal Society of Chemistry journal article supplement (doi:10.1039/d2ta03467k), 2022-01-01
Supplement: d2ta03467k1.pdf [file d2ta03467k1.pdf]

## Supporting information

### Interface engineering of calligraphic ink mediated conformal polymer fibers for advanced flexible supercapacitors

Pengzhen Wang,<sup>a</sup> Kai Liu,<sup>a</sup> Xiaoxiao Wang,<sup>a</sup> Zhaoting Meng,<sup>b</sup> Zhefeng Xin,<sup>c</sup>  
Chaochao Cui,<sup>c</sup> Fengyu Quan,<sup>a</sup> Kewei Zhang<sup>\*a</sup> and Yanzhi Xia<sup>\*a</sup>

<sup>a</sup>. State Key Laboratory of Bio-Fibers and Eco-Textiles, Collaborative Innovation Center for Marine Biomass Fibers, Materials and Textiles of Shandong Province, College of Materials Science and Engineering, Institute of Marine Biobased Materials, Qingdao University, Qingdao 266071, P. R. China

<sup>b</sup>. School of Chemical Engineering, Shandong Institute of Petroleum and Chemical Technology, Dongying 257061, P. R. China

<sup>c</sup>. Baoshan Hengfeng Textile Technology Co., Ltd., Yunnan 678000, P. R. China

**\*Corresponding authors, E-mail:** zhkw@qdu.edu.cn (K. Zhang); xiayz@qdu.edu.cn (Y. Xia)

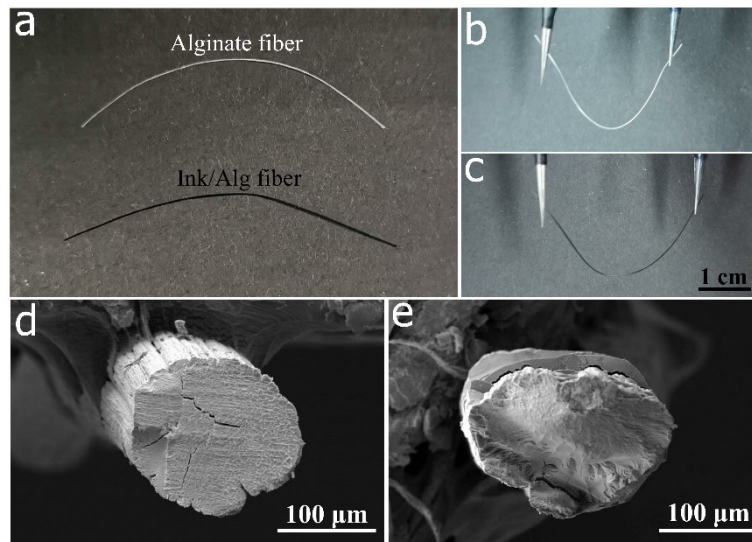

Fig. S1 (a-c) Photographs of obtained alginate (Alg) fiber (b) and Ink/Alg fiber (c), showing the color change from white to black. (d-e) Cross-sectional SEM images of Alg fiber (d) and Ink/Alg fiber (e).

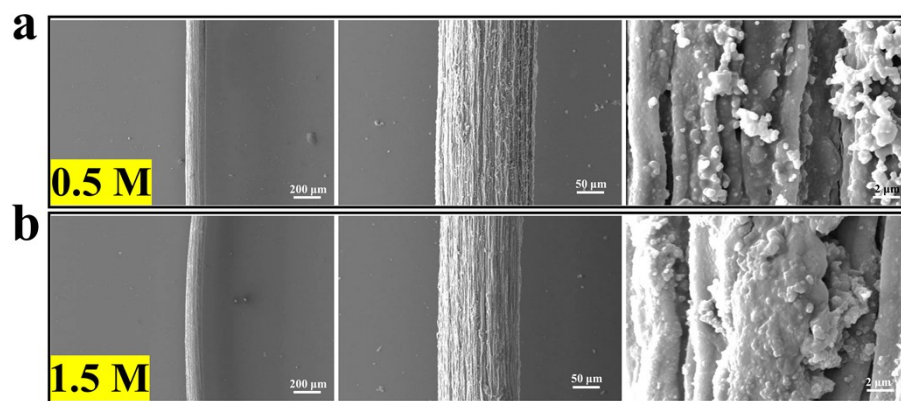

**Fig. S2** (a) SEM images of PPy<sub>0.5-60</sub>/Ink/Alg. (b) SEM images of PPy<sub>1.5-60</sub>/Ink/Alg.

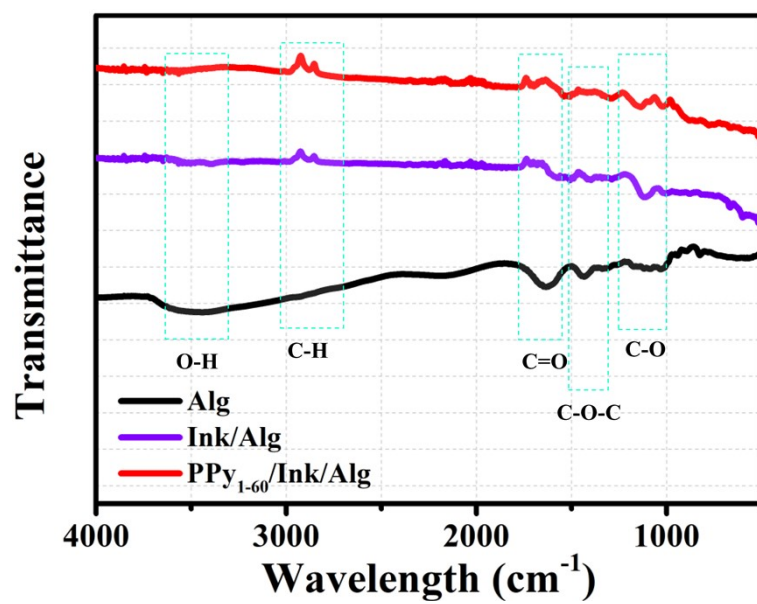

**Fig. S3** FT-IR spectra of Alg, Ink/Alg and PPy<sub>1-60</sub>/Ink/Alg.

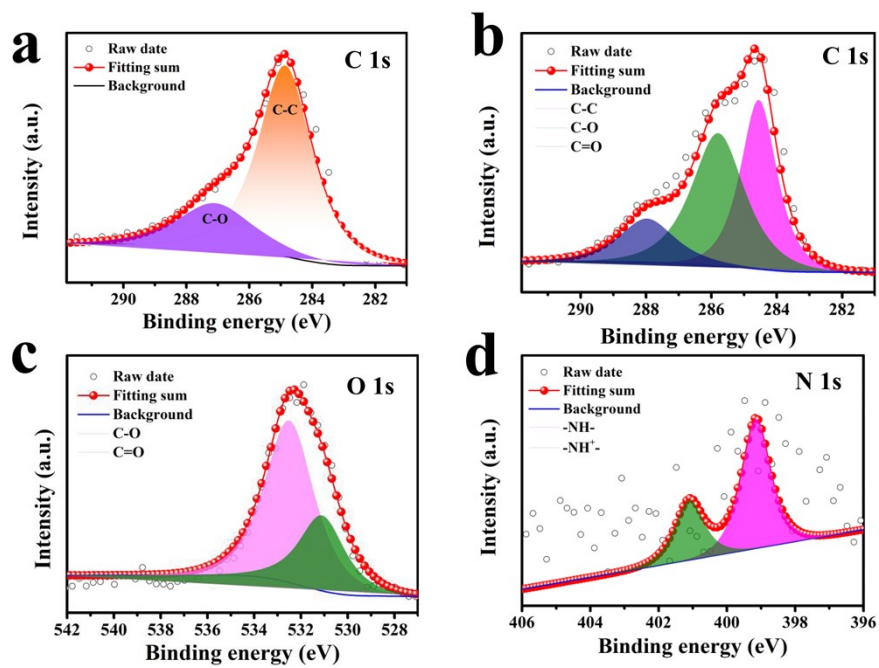

**Fig. S4** (a) C 1s XPS spectra of PPy<sub>1-60</sub>/Ink/Alg. (b-d) High-resolution XPS spectra of Alg, showing C 1s (b), N 1s (c) and O 1s (d).

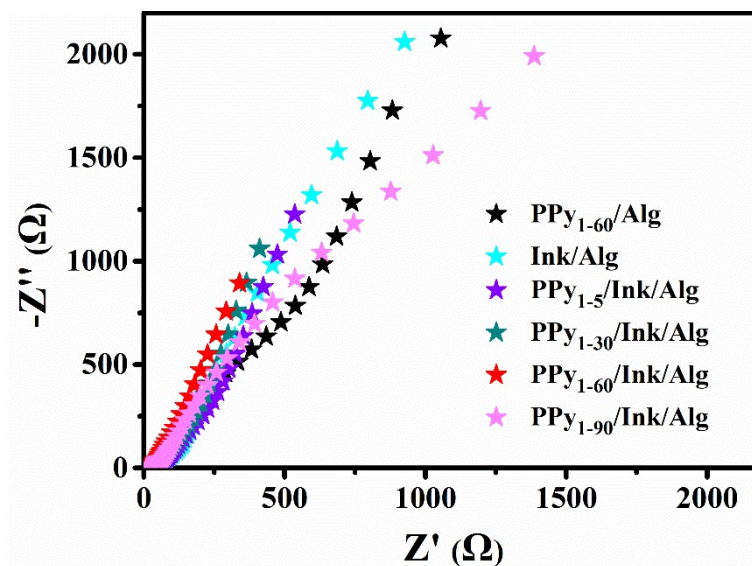

**Fig. S5** Nyquist plots of  $\text{PPy}_{1-60}/\text{Alg}$ ,  $\text{Ink}/\text{Alg}$  and  $\text{PPy}_{1-y}/\text{Ink}/\text{Alg}$  ( $y = 5, 30, 60$  and  $90$  min).

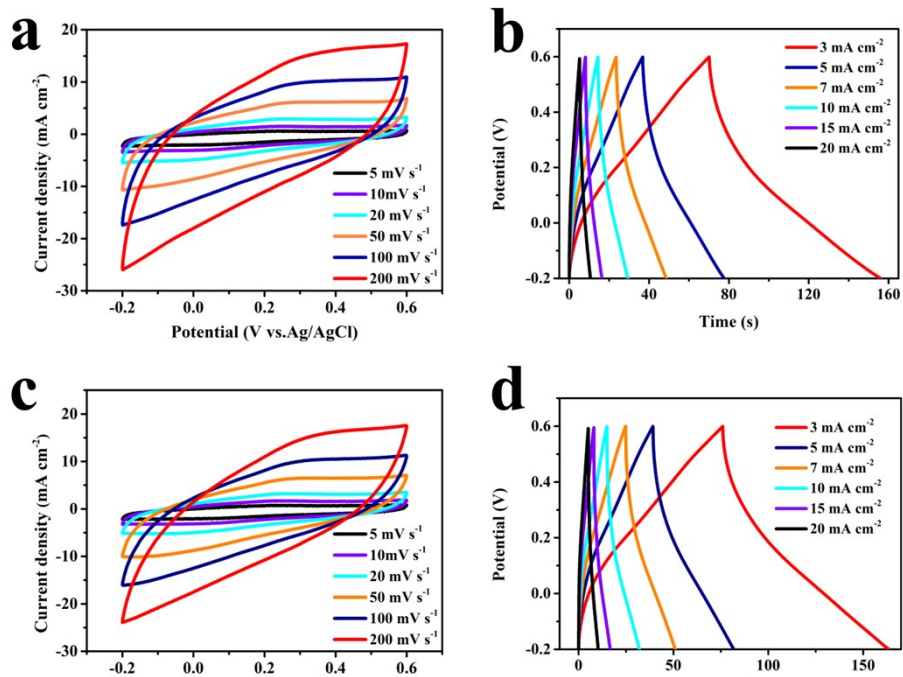

**Fig. S6** (a-b) CV curves and GCD profiles of PPy<sub>0.5-60</sub>/Ink/Alg at different scan rates and areal current densities. (c-d) CV curves and GCD profiles of PPy<sub>1.5-60</sub>/Ink/Alg at different scan rates and areal current densities.

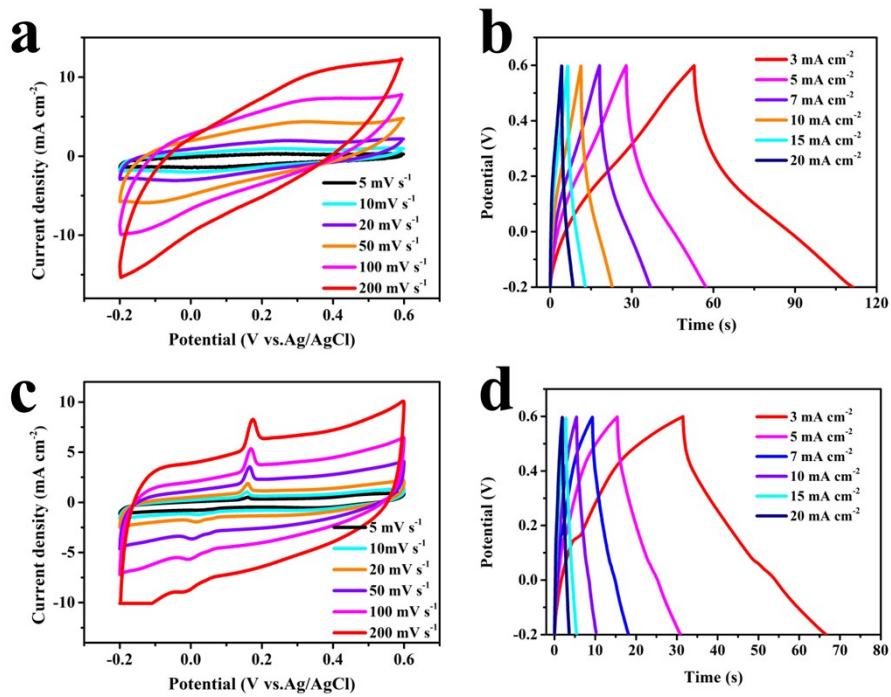

**Fig. S7** (a-b) CV curves and GCD profiles of Ink/Alg at different scan rates and areal current densities. (c-d) CV curves and GCD profiles of PPy<sub>1-60</sub>/Alg at different scan rates and areal current densities.



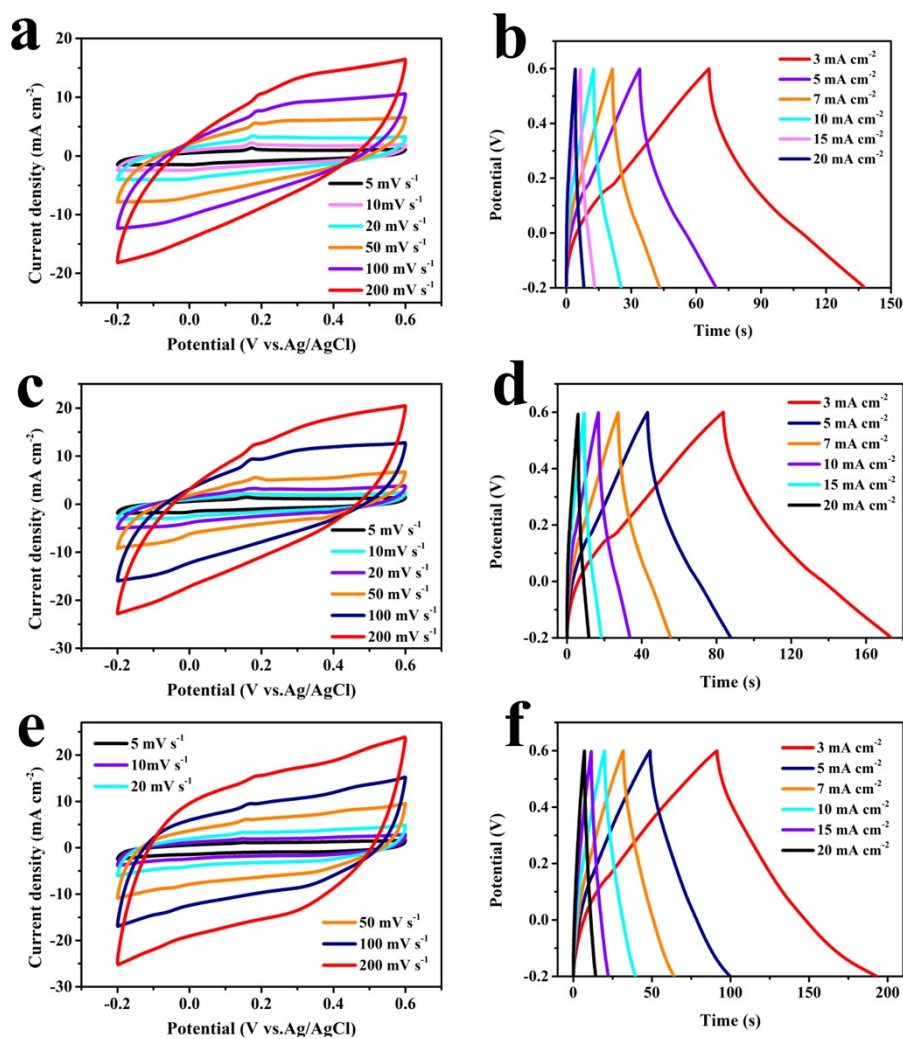

**Fig. S8** (a-b) CV and GCD profiles of PPy<sub>1.5</sub>/Ink/Alg at different scan rates and areal current densities. (c-d) CV and GCD profiles of PPy<sub>1.30</sub>/Ink/Alg at different scan rates and areal current densities. (e-f) CV and GCD profiles of PPy<sub>1.90</sub>/Ink/Alg at different scan rates and areal current densities.

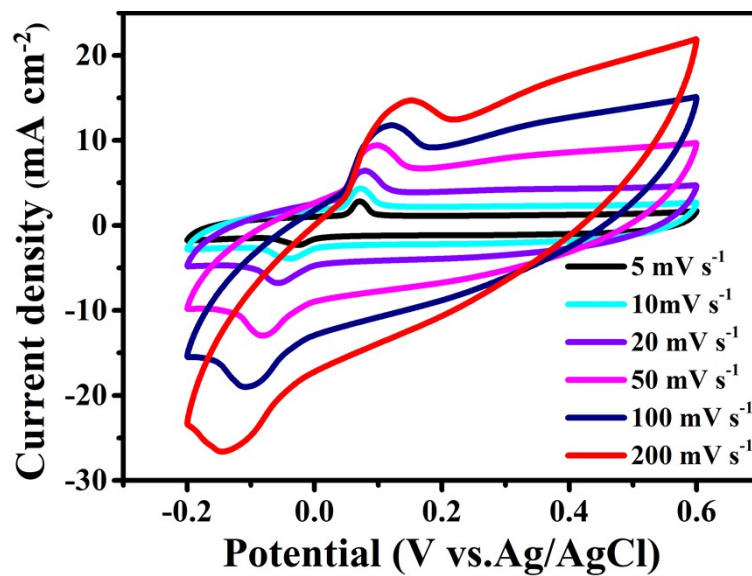

**Fig. S9** CV profiles of PPy<sub>1-60</sub>/Ink/Alg at different scan rates (1 M KCl aqueous solution served as electrolyte).

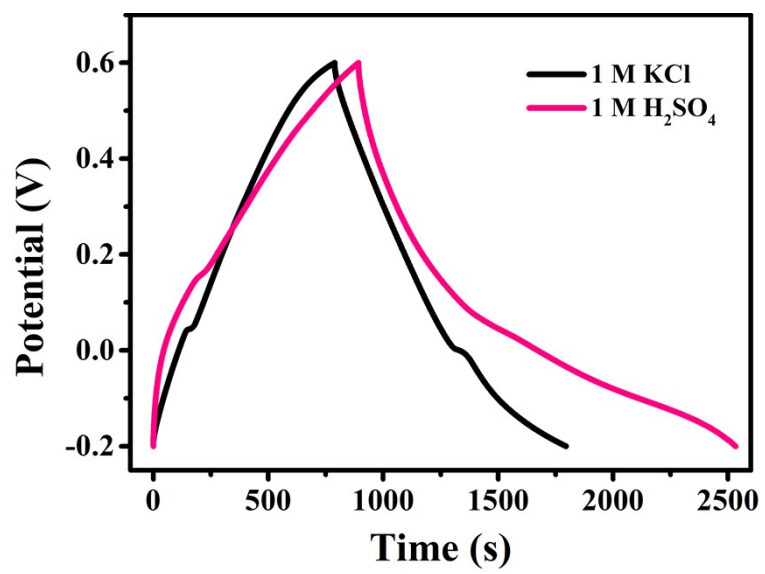

**Fig. S10** GCD profiles of PPy<sub>1-60</sub>/Ink/Alg at different electrolytes.

**Table S1** XPS peak fitting results of Alg and PPy<sub>1-60</sub>/Ink/Alg.

| Sample                        | C (at. %) |       |       | N (at. %)          |      | O (at. %) |       | Ca (at. %) |
|-------------------------------|-----------|-------|-------|--------------------|------|-----------|-------|------------|
|                               | C=O       | C-O   | C-C   | -NH <sup>+</sup> - | -NH- | C=O       | C-O   | %          |
| Alg                           | 8.95      | 25.81 | 22.57 | 0.48               | 1.04 | 16.98     | 19.77 | 4.39       |
| PPy <sub>1-60</sub> /Ink/ Alg |           | 17.25 | 53.48 | 6.17               | 5.50 | 2.37      | 5.50  | 0.40       |

**Table S2** Specific capacities of PPy<sub>1-60</sub>/Ink/Alg at areal current densities.

| I (mA cm <sup>-2</sup> )              | 0.5    | 0.7   | 1     | 1.5   | 2     | 3     | 4     | 5     | 7     | 10    | 15    | 20    |
|---------------------------------------|--------|-------|-------|-------|-------|-------|-------|-------|-------|-------|-------|-------|
| C <sub>A</sub> (mF cm <sup>-2</sup> ) | 1025.6 | 816.4 | 640.0 | 546.6 | 507.3 | 430.9 | 366.5 | 355.0 | 314.1 | 271.3 | 226.9 | 192.5 |

**Table S3** Volumetric specific capacitances of the composite fiber and the corresponding supercapacitor at different scan rates.

|                                                |      |      |      |      |      |      |
|------------------------------------------------|------|------|------|------|------|------|
| Scan rate (mV s <sup>-1</sup> )                | 5    | 10   | 20   | 50   | 100  | 200  |
| C <sub>PPy/Ink/Alg</sub> (F cm <sup>-3</sup> ) | 85.5 | 75.9 | 62.0 | 44.2 | 31.2 | 21.1 |
| Scan rate (mV s <sup>-1</sup> )                | 1    | 2    | 3    | 4    | 5    | 10   |
| C <sub>FESCS</sub> (F cm <sup>-3</sup> )       | 6.3  | 5.8  | 5.4  | 5.1  | 4.8  | 3.7  |
